# Supplementary material for: Histone modifications facilitate the coexpression of bidirectional promoters in rice
Source: PubMed Central journal article supplement (PMC5045660; doi:10.1186/s12864-016-3125-0), 2016-09-30
Supplement: 12864_2016_3125_MOESM2_ESM.pdf [file 12864_2016_3125_MOESM2_ESM.pdf]

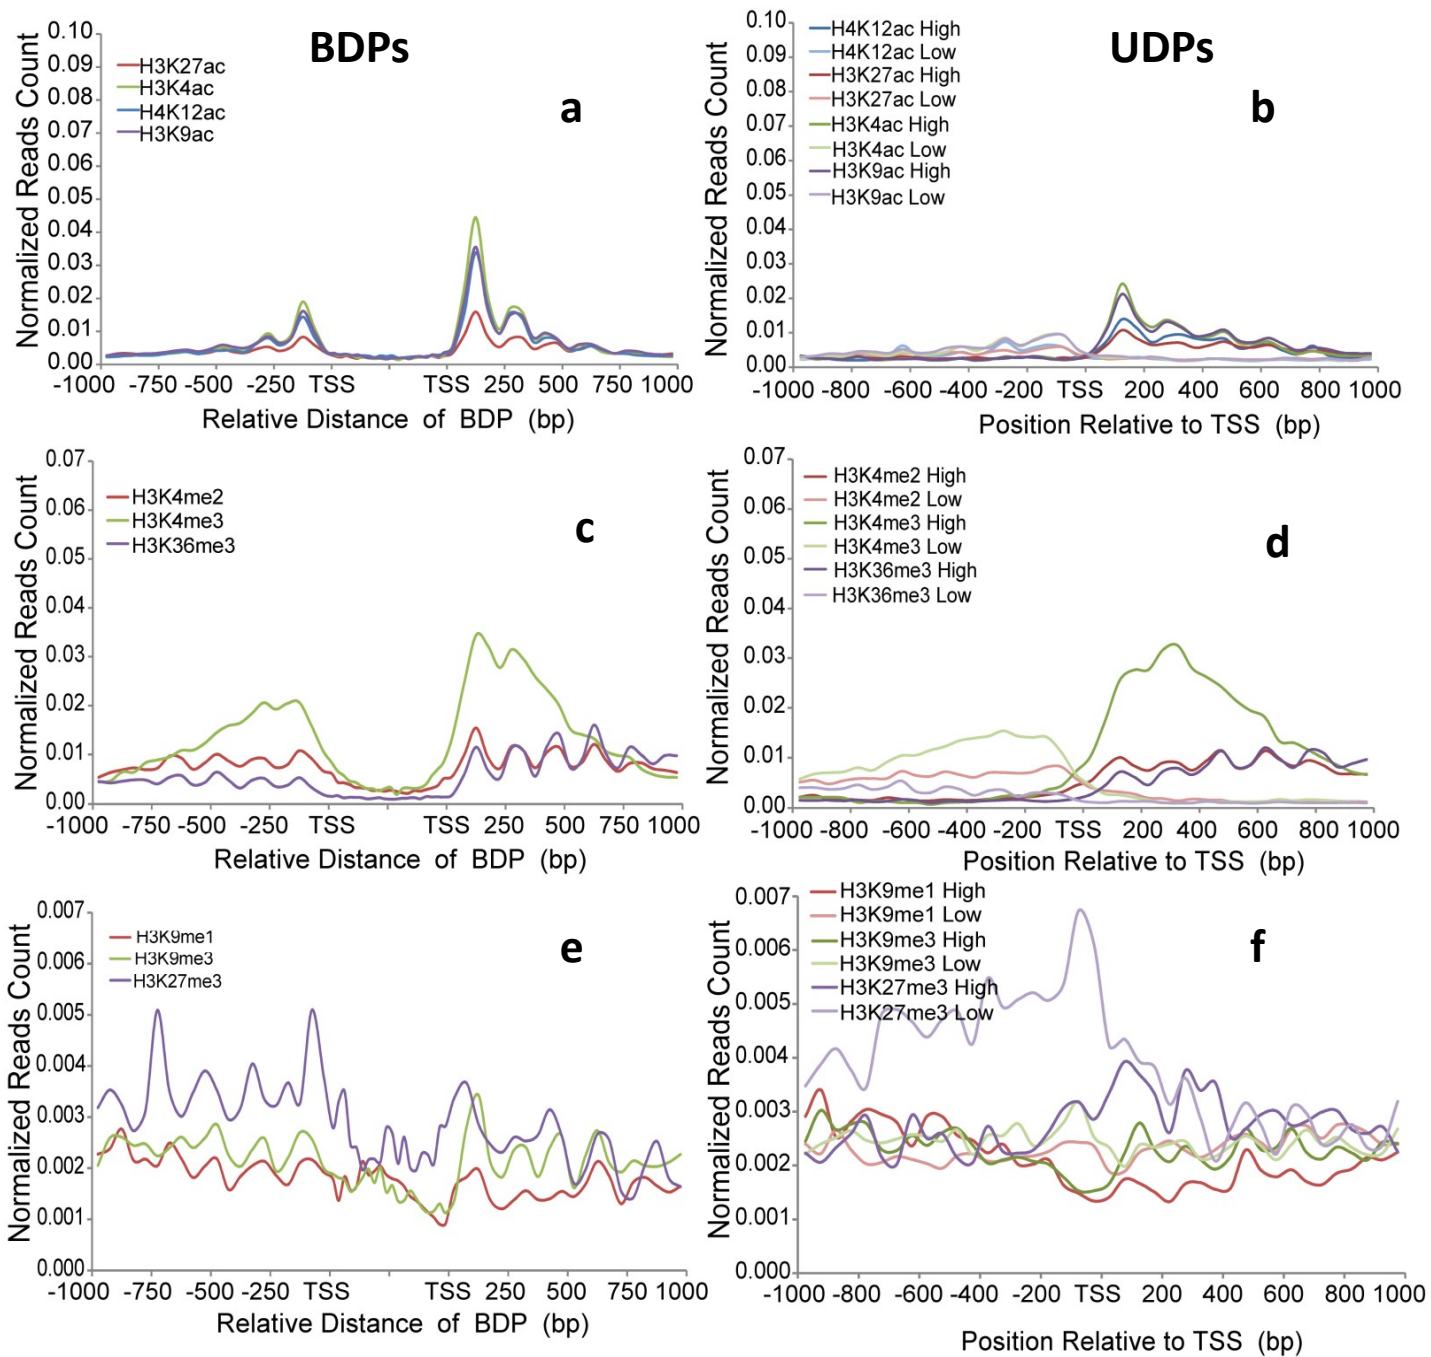

**Additional file 2: Figure S2.**
