# Supplementary material for: Histone modifications facilitate the coexpression of bidirectional promoters in rice
Source: PubMed Central journal article supplement (PMC5045660; doi:10.1186/s12864-016-3125-0), 2016-09-30
Supplement: 12864_2016_3125_MOESM5_ESM.pdf [file 12864_2016_3125_MOESM5_ESM.pdf]

**Additional file 5: Table S1**

| <b>Types of BDPs</b>      | <b>Promoter regions (%)</b> |
|---------------------------|-----------------------------|
| <b>0~250(BDPs I )</b>     |                             |
| GC                        | 54.22                       |
| TATA-box                  | 17.59                       |
| <b>250~500(BDPs II )</b>  |                             |
| GC                        | 49.77                       |
| TATA-box                  | 51.84                       |
| <b>500~1000(BDPs III)</b> |                             |
| GC                        | 45.33                       |
| TATA-box                  | 81.83                       |
| <b>Random I</b>           |                             |
| GC                        | 47.05                       |
| TATA-box                  | 46.50                       |
| <b>Random II</b>          |                             |
| GC                        | 43.72                       |
| TATA-box                  | 70.90                       |
| <b>Random III</b>         |                             |
| GC                        | 42.03                       |
| TATA-box                  | 90.50                       |
