# Supplementary material for: Histone modifications facilitate the coexpression of bidirectional promoters in rice
Source: PubMed Central journal article supplement (PMC5045660; doi:10.1186/s12864-016-3125-0), 2016-09-30
Supplement: 12864_2016_3125_MOESM8_ESM.pdf [file 12864_2016_3125_MOESM8_ESM.pdf]

**Additional file 8: Table S4:**

| <b>Motif Name</b>             | <b>Query count</b> | <b>SD</b> | <b>P-value</b> | <b>Motif seq</b> |
|-------------------------------|--------------------|-----------|----------------|------------------|
| <b>Constitutive BDPs</b>      |                    |           |                |                  |
| <b>SORLIP2AT</b>              | 500                | 5.146584  | 1.00e-7        | <b>GGGCC</b>     |
| <b>SITEIIATCYTC</b>           | 47                 | 10.58654  | 0              | <b>TGGGCY</b>    |
| <b>UP1ATMSD</b>               | 81                 | 9.883992  | 0              | <b>GGCCCAWWW</b> |
| <b>Seedling-specific BDPs</b> |                    |           |                |                  |
| <b>TBF1HSF</b>                | 17                 | 2.625993  | 4.32e-3        | <b>GAAGAAGAA</b> |
| <b>Callus-specific BDPs</b>   |                    |           |                |                  |
| <b>ACGTABREMOTIFA2OSEM</b>    | 41                 | 3.206062  | 6.73e-4        | <b>ACGTGKC</b>   |
| <b>BOXIIPCCHS</b>             | 31                 | 3.055217  | 1.12e-3        | <b>ACGTGGC</b>   |
