# Supplementary material for: Histone modifications facilitate the coexpression of bidirectional promoters in rice
Source: PubMed Central journal article supplement (PMC5045660; doi:10.1186/s12864-016-3125-0), 2016-09-30
Supplement: 12864_2016_3125_MOESM9_ESM.pdf [file 12864_2016_3125_MOESM9_ESM.pdf]

## Additional file 9: Table S5

| Motif Name                 | Query count | Frequency | SD       | p-value  | Motif seq | regulated |
|----------------------------|-------------|-----------|----------|----------|-----------|-----------|
| <b>SORLIP2AT</b>           | 177/168     | 2.85/2.40 | 3.141766 | 8.40e-04 | GGGCC     | up/down   |
| <b>SITEIIATCYTC</b>        | 151/150     | 2.44/2.14 | 5.037221 | 2.00e-07 | TGGGCY    | up/down   |
| ABRERATCAL                 | 94          | 1.52      | 2.226813 | 0.01298  | MACGYGB   | up        |
| CACGTGMOTIF                | 46          | 0.74      | 1.886906 | 0.02959  | CACGTG    | up        |
| <b>ACGTABREMOTIFA2OSEM</b> | 42          | 0.68      | 4.183141 | 1.44e-05 | ACGTGKC   | up        |
| CAMTA1                     | 30          | 0.48      | 1.939313 | 0.02623  | CCGCGT    | up        |
| <b>BOXIIPCCHS</b>          | 25          | 0.40      | 2.450225 | 0.00714  | ACGTGGC   | up        |
| <b>UP1ATMSD</b>            | 22/22       | 0.35/0.31 | 3.893964 | 4.93e-05 | GGCCCAWWW | up/down   |
| IRO2OS                     | 21          | 0.34      | 1.905147 | 0.02838  | CACGTGG   | up        |
| GADOWNAT                   | 17          | 0.27      | 4.552036 | 2.7e-06  | ACGTGTC   | up        |
| <b>ABREATCONSENSUS</b>     | 15          | 0.24      | 2.47537  | 0.00665  | YACGTGGC  | up        |
| EMBP1TAEM                  | 10          | 0.16      | 2.231832 | 0.01281  | CACGTGGC  | up        |
| <b>HEXAT</b>               | 10          | 0.16      | 2.161833 | 0.01532  | TGACGTGG  | up        |
| <b>UPRMOTIFIAT</b>         | 10          | 0.16      | 2.161833 | 0.01532  | CCACGTCA  | up        |

**Notes:** up and down corresponding to up-regulation and down-regulation of gene expression under drought treatment as compared to the untreated control. Red-colored highlights represent overrepresented motifs in BDPs are not related to drought stress response
