# Supplementary material for: Histone modifications facilitate the coexpression of bidirectional promoters in rice
Source: PubMed Central journal article supplement (PMC5045660; doi:10.1186/s12864-016-3125-0), 2016-09-30
Supplement: 12864_2016_3125_MOESM10_ESM.pdf [file 12864_2016_3125_MOESM10_ESM.pdf]

Additional file 10: Table S6

| BDPS     | Co-expression | Anti-expression | Independent expression | Null         | Total |
|----------|---------------|-----------------|------------------------|--------------|-------|
| BDPs- I  | 145 (50%)     | 20 (6.90%)      | 98 (33.79%)            | 27 (9.31%)   | 290   |
| BDPs- II | 86(29.25%)    | 26(8.84%)       | 83(28.23%)             | 99 (33.67%)  | 294   |
| BDPs-III | 133(21.21%)   | 49(7.81%)       | 188(29.98%)            | 257 (40.99%) | 627   |
| Random   | 148(14.80%)   | 121(12.1%)      | 341(34.10%)            | 390 (39.00%) | 1000  |

**Note:** 1000 non-adjacent gene pairs were randomly selected for calculating Pearson correlation coefficient. Gene pairs with Pearson correlation coefficient greater than the average number of all positive values (0.38) were defined as co-expressed ones; gene pairs with Pearson correlation coefficient less than the average number of all negative values (-0.20) were defined as anti-expressed ones; gene pairs with Pearson correlation coefficient between -0.2 and 0.38 were defined as independent ones. Null indicate gene pairs can't test the Pearson correlation coefficient.
