# Supplementary material for: Histone modifications facilitate the coexpression of bidirectional promoters in rice
Source: PubMed Central journal article supplement (PMC5045660; doi:10.1186/s12864-016-3125-0), 2016-09-30
Supplement: 12864_2016_3125_MOESM11_ESM.pdf [file 12864_2016_3125_MOESM11_ESM.pdf]

Additional file 11: Table S7

| Histone marks   | 250bp | 250bp | 250bp | 250bp | 500bp | 500bp | 500bp | 500bp | 1000b  | 1000bp | 1000bp | 1000bp |
|-----------------|-------|-------|-------|-------|-------|-------|-------|-------|--------|--------|--------|--------|
|                 | FPKM  | FPKM  | FPKM  | FPKM  | FPKM  | FPKM  | FPKM  | FPKM  | p FPKM | FPKM   | FPKM   | FPKM   |
|                 | +     | +     | -     | -     | +     | +     | -     | -     | +      | +      | -      | -      |
|                 | (1x)  | (5x)  | (1x)  | (5x)  | (1x)  | (5x)  | (1x)  | (5x)  | (1x)   | (5x)   | (1x)   | (5x)   |
| H4K12ac         | 2.44  | 2.65  | 2.73  | 2.60  | 2.43  | 2.12  | 1.95  | 1.80  | 1.39   | 1.29   | 1.57   | 1.40   |
| H3K27ac         | 2.42  | 2.28  | 2.11  | 2.03  | 1.49  | 1.42  | 1.45  | 1.36  | 1.14   | 1.10   | 1.28   | 1.20   |
| H3K4ac          | 2.02  | 2.08  | 2.15  | 2.37  | 1.84  | 1.66  | 1.99  | 1.57  | 1.25   | 1.20   | 1.52   | 1.30   |
| H3K9ac          | 1.98  | 1.95  | 2.11  | 2.27  | 1.68  | 2.01  | 1.75  | 1.47  | 1.17   | 1.15   | 1.50   | 1.28   |
| H3K23ac         | 1.87  | 1.74  | 1.90  | 1.81  | 1.37  | 1.42  | 1.34  | 1.14  | 1.13   | 1.10   | 1.21   | 1.15   |
| H4K16ac         | 1.86  | 1.72  | 1.84  | 1.77  | 1.28  | 1.32  | 1.28  | 1.16  | 1.13   | 1.08   | 1.14   | 1.11   |
| H3K4me1         | 1.61  | 1.61  | 1.67  | 1.66  | 1.21  | 1.31  | 1.39  | 1.40  | 1.05   | 1.11   | 1.10   | 1.06   |
| H3K4me2         | 1.55  | 1.59  | 1.50  | 1.42  | 1.34  | 1.47  | 1.31  | 1.15  | 1.08   | 1.07   | 0.94   | 0.97   |
| H3K36me3        | 1.57  | 1.58  | 1.85  | 1.85  | 1.33  | 1.42  | 1.20  | 1.37  | 1.12   | 1.17   | 1.13   | 1.19   |
| H3K4me3         | 1.41  | 1.41  | 1.44  | 1.50  | 1.06  | 1.17  | 1.35  | 1.37  | 1.00   | 1.07   | 1.13   | 1.20   |
| H3K9me3         | 1.33  | 1.33  | 1.33  | 1.37  | 1.23  | 1.19  | 0.90  | 1.04  | 1.08   | 1.05   | 0.99   | 0.96   |
| H3K9me1         | 1.19  | 1.31  | 1.22  | 1.26  | 0.93  | 1.13  | 1.04  | 1.20  | 1.09   | 1.06   | 1.10   | 1.07   |
| H3K27me3        | 0.58  | 0.66  | 0.33  | 0.54  | 0.93  | 0.87  | 0.76  | 0.78  | 0.51   | 0.75   | 0.58   | 0.59   |
| MNase-seq reads | 1.33  | 1.45  | 1.27  | 1.44  | 1.18  | 1.44  | 1.07  | 1.07  | 1.06   | 1.17   | 1.00   | 1.02   |

Notes: "+" and "-" represent BDPs with high and low FPKM values, respectively.
