# Supplementary material for: Histone modifications facilitate the coexpression of bidirectional promoters in rice
Source: PubMed Central journal article supplement (PMC5045660; doi:10.1186/s12864-016-3125-0), 2016-09-30
Supplement: 12864_2016_3125_MOESM12_ESM.pdf [file 12864_2016_3125_MOESM12_ESM.pdf]

**Additional file 12: Table S8**

| ID of Gene pairs | H4K12ac                             |             | H3K27ac                   |             |                            |
|------------------|-------------------------------------|-------------|---------------------------|-------------|----------------------------|
|                  | ChIP-seq                            | ChIP-qPCR   | ChIP-seq                  | ChIP-qPCR   |                            |
|                  | Normalized reads count              | % Input     | Normalized reads count    | % Input     |                            |
| BDPs-1           | LOC_Os10g36260(+)/LOC_Os10g36250(-) | 0.047/0.021 | 10.44 ± 4.09/5.58 ± 0.96  | 0.008/0.03  | 21.34 ± 4.35/58.39 ± 19.16 |
| BDPs-2           | LOC_Os04g51270(+)/LOC_Os04g51280(-) | 0.041/0.005 | 11.37 ± 1.39/4.30 ± 0.68  | 0.011/0.005 | 36.91 ± 8.90/14.60 ± 2.15  |
| BDPs-3           | LOC_Os08g03390(+)/LOC_Os08g03380(-) | 0.054/0.036 | 12.33 ± 0.39/9.94 ± 1.58  | 0.014/0.01  | 42.53 ± 1.30/32.28 ± 4.59  |
| BDPs-4           | LOC_Os04g56646(+)/LOC_Os04g56640(-) | 0.04/0.023  | 14.43 ± 2.15/6.82 ± 0.75  | 0.015/0.012 | 55.24 ± 13.25/35.09 ± 4.06 |
| BDPs-5           | LOC_Os03g58150(+)/LOC_Os03g58160(-) | 0.036/0.017 | 22.96 ± 5.43/14.02 ± 1.18 | 0.007/0.001 | 82.88 ± 20.15/42.44 ± 9.90 |

**Note:** (+) represents the gene with higher FPKM  
 (-) represents the gene with lower FPKM
