# Supplementary material for: Histone modifications facilitate the coexpression of bidirectional promoters in rice
Source: PubMed Central journal article supplement (PMC5045660; doi:10.1186/s12864-016-3125-0), 2016-09-30
Supplement: 12864_2016_3125_MOESM13_ESM.pdf [file 12864_2016_3125_MOESM13_ESM.pdf]

### Additional file 13: Table S9

| Histone marks               | 250bp with high FPKM | 250bp with low FPKM | 500bp with high FPKM | 500bp with low FPKM | 1000bp with high FPKM | 1000bp with low FPKM |
|-----------------------------|----------------------|---------------------|----------------------|---------------------|-----------------------|----------------------|
| H4K12ac                     | 0.00186**            | 0.00006**           | 0.00949**            | 0.12010             | 0.61230               | 0.00205**            |
| H3K4ac                      | 0.00051**            | 0.00025**           | 0.09857              | 0.45210             | 0.70690               | 0.39360              |
| H4K16ac                     | 0.00456**            | 2.73e-05**          | 0.2083               | 0.5154              | 0.356                 | 0.1405               |
| H3K4me2                     | 0.00036**            | 0.00252**           | 0.12010              | 0.00413**           | 0.75310               | 0.70690              |
| H3K36me3                    | 2.28e-06**           | 2.64e-09**          | 0.24680              | 0.00413**           | 0.22970               | 0.01997*             |
| <b>Nucleosome occupancy</b> | 1.48e-07**           | 0.00036**           | 0.71920              | 0.45210             | 0.61230               | 0.61230              |
| H3K27me3                    | 0.07275              | 5.35e-06**          | 0.58200              | 0.65060             | 0.61230               | 0.00560**            |
| H3K27ac                     | 0.56230              | 0.08978             | 0.45210              | 0.65060             | 0.75310               | 0.43360              |
| H3K9ac                      | 0.07275              | 0.02292             | 0.12010              | 0.65060             | 0.08160               | 0.39360              |
| H3K23ac                     | 0.11                 | 0.4326              | 0.9696               | 0.4521              | 0.1405                | 0.09391              |
| H3K4me3                     | 0.11000              | 0.08978             | 0.33920              | 0.00024**           | 0.06102               | 0.07067              |
| H3K9me1                     | 0.04679*             | 0.08978             | 0.96960              | 0.00124**           | 0.14050               | 0.18080              |
| H3K9me3                     | 0.11000              | 0.07275             | 0.51540              | 0.02622*            | 0.35600               | 0.91020              |

**Note:** \* $p < 0.05$  representing significant change.

\*\* $p < 0.01$  representing extremely significant change.
