# Supplementary material for: Histone modifications facilitate the coexpression of bidirectional promoters in rice
Source: PubMed Central journal article supplement (PMC5045660; doi:10.1186/s12864-016-3125-0), 2016-09-30
Supplement: 12864_2016_3125_MOESM14_ESM.pdf [file 12864_2016_3125_MOESM14_ESM.pdf]

**Additional file 14: Table S10**

| <b>Histone marks</b>        | <b>Co-expression</b> | <b>Anti-expression</b> |
|-----------------------------|----------------------|------------------------|
| H3K4ac                      | 0.31110              | 6.25e-08**             |
| H4K12ac                     | 0.70430              | 2.38e-06**             |
| H3K9ac                      | 0.57980              | 8.45e-06**             |
| H3K27ac                     | 0.31110              | 7.09e-05**             |
| H3K4me3                     | 0.64190              | 0.04474*               |
| H4K16ac                     | 0.3466               | 0.00022**              |
| H3K27me3                    | 0.35710              | 0.00029**              |
| H3K9me1                     | 0.16860              | 1.76e-05**             |
| H3K9me3                     | 0.23170              | 0.01226*               |
| H3K4me2                     | 0.00158**            | 0.00450**              |
| H3K36me3                    | 7.27e-05**           | 9.99e-16**             |
| H3K23ac                     | 2.75e-05**           | 0.03771*               |
| <b>Nucleosome occupancy</b> | 0.00767**            | 3.97e-06**             |

**Note:** \* $p < 0.05$  representing significant change.

\*\* $p < 0.01$  representing extremely significant change.
