# Supplementary material for: Histone modifications facilitate the coexpression of bidirectional promoters in rice
Source: PubMed Central journal article supplement (PMC5045660; doi:10.1186/s12864-016-3125-0), 2016-09-30
Supplement: 12864_2016_3125_MOESM15_ESM.pdf [file 12864_2016_3125_MOESM15_ESM.pdf]

### Additional file 15: Table S11:

|               | Gene pairs ID     | FPKM   | Forward sequence       | Reverse sequence       | Amplificon (bp) |
|---------------|-------------------|--------|------------------------|------------------------|-----------------|
| <b>BDPs-1</b> | LOC_Os10g36260(+) | 147.01 | AGAGTGGGAGCGGGACGT     | AGGGAGGCGAGCTTGAGGG    | 148             |
|               | LOC_Os10g36250(-) | 8.14   | AACAAATCAACCTGCGAGTA   | ATTGGTGAGCTGACCGAC     | 143             |
| <b>BDPs-2</b> | LOC_Os04g51270(+) | 139.91 | CGACTAGGGAACAAGGAA     | TGATAGTAGGCAGATTGAGTAA | 136             |
|               | LOC_Os04g51280(-) | 83.7   | GGCCGGAGTCGTCGTACT     | TCGATCATCTGCTGCTTGG    | 157             |
| <b>BDPs-3</b> | LOC_Os08g03390(+) | 102.67 | GTGGATTTGGTGTAGATTTTCG | AATTCAGGCAACGCAGAG     | 124             |
|               | LOC_Os08g03380(-) | 22.03  | CACCTCGTAGGGGTTCTCC    | GGCATGGAATGAAGGGTC     | 123             |
| <b>BDPs-4</b> | LOC_Os04g56646(+) | 79.02  | CGCGTTAGGGTTTCTTCG     | TGCACCACCACCTTCTCC     | 153             |
|               | LOC_Os04g56640(-) | 24.98  | AGACTTGCCCAGGCTCAG     | TTGAATCAATGCCCAGAT     | 146             |
| <b>BDPs-5</b> | LOC_Os03g58150(+) | 67.25  | GAGGATGACGTAGATCTTGTG  | GAAGAGGGAAGCCATGTT     | 130             |
|               | LOC_Os03g58160(-) | 22.44  | TCCTCGTCCTCAAATCTCC    | GAACCCGACAGAATCAGAAA   | 131             |

**Note:** (+) represents the gene with higher FPKM  
 (-) represents the gene with lower FPKM
